RESEARCH ARTICLE

# Is manure an alternative to topsoil in road embankment restoration?

Begoña Peco<sup>1\*</sup>, Desirée Rivera<sup>1</sup>, Pablo García-Palacios<sup>2</sup>, Berta M. Jauregui<sup>3</sup>

**1** Departamento de Ecología, Universidad Autónoma de Madrid, Madrid, Spain, **2** Área de Biodiversidad y Conservación, Departamento de Biología y Geología, Universidad Rey Juan Carlos, Móstoles, Madrid, **3** Dirección Técnica, Obrascón Huarte Lain, S.A. (OHL), Madrid, Spain

\* [begonna.peco@uam.es](mailto:begonna.peco@uam.es)

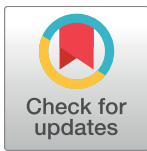

## Abstract

One of the main steps in road and railway embankment restoration is the spreading of previously removed topsoil, which provides an input of seeds, organic matter and microorganisms and encourages the establishment of a vegetation cover, essential to stabilise the embankment and blend it with the landscape. However, topsoil is a scarce resource, prompting the search for economic alternatives with similar results. The present study compares the results of spreading topsoil with an organic amendment (manure) for the soil's physico-chemical properties, erosion resistance and microbial activity, floristic richness and composition, and bare soil cover. For this purpose, experimental plots with three treatments (Control, Topsoil and Manure) were maintained on a recently built embankment in Central Spain for 20 months. Manure was found to be an effective alternative to topsoil for the improvement of soil fertility (organic matter content and total nitrogen). The two types of organic amendment produced similar reductions in bare soil cover and erosion rates. However, plots with topsoil showed greater soil respiration and species richness and a different floristic composition in comparison to those treated with manure, which was closer to control plots. These results suggest that manure can be used to replace topsoil to enhance embankment stability during the early stages of restoration. However, if the aim of the restoration process is to promote plant diversity, topsoil is recommended.

## OPEN ACCESS

**Citation:** Peco B, Rivera D, García-Palacios P, Jauregui BM (2017) Is manure an alternative to topsoil in road embankment restoration? PLoS ONE 12(3): e0174622. <https://doi.org/10.1371/journal.pone.0174622>

**Editor:** Cristina Armas, Estacion Experimental de Zonas Aridas, SPAIN

**Received:** November 22, 2016

**Accepted:** March 12, 2017

**Published:** March 27, 2017

**Copyright:** © 2017 Peco et al. This is an open access article distributed under the terms of the [Creative Commons Attribution License](https://creativecommons.org/licenses/by/4.0/), which permits unrestricted use, distribution, and reproduction in any medium, provided the original author and source are credited.

**Data Availability Statement:** All relevant data are within the paper and its Supporting Information files.

**Funding:** This paper is part of a broader industrial research project, CENIT-OASIS (Safe, Intelligent and Sustainable Highway Operation), approved under CENIT tender 2008-2011, and was a collaboration between Obrascón Huarte Lain S.A. Corporation (OHL) and the Ecology Department of the Autónoma University of Madrid. Grants were received from the Ministry of Science and Innovation Centre for Industrial and Technology

## Introduction

Linear infrastructure—motorways and railway lines—has undergone a major expansion in recent years due to population growth and increased mobility. Road easements cover 1% of the land area in most developed countries [1]. An estimated 1.5% of the European Union is covered by motorways and 5% by railway lines [2]. This area is expected to increase in the coming years.

Steep embankments and large areas lacking vegetation are generated during the construction of linear infrastructures [3–5]. Embankments are artificial structures built where the infrastructure platform has to cross hills. They generally have steep slopes, nutrient-poor soils and little vegetation cover [6, 7], making them vulnerable to deleterious erosion and consequently

Development (CDTI). The project is jointly funded by Madrid Regional Government grants for research groups, REMEDINAL 2 (S-2009/AMB/783) and REMEDINAL 3 (P2013-MAE2719) from the Spanish Ministry of Science and Innovation, and assistance from the Torres Quevedo Sub-programme for the employment of Dr. Berta Martínez Jáuregui by OHL, under the auspices of the Ministry of Science and Innovation.

**Competing interests:** The authors have declared that no competing interests exist.

high environmental and financial costs [8, 9]. These features and the lack of a natural reference ecosystem hinder their restoration, and they often require major investment by the authorities that exploit the infrastructure [10]. Restoration of the plant cover on embankments is indispensable during the initial stages immediately after a road or railway track is built in order to prevent soil erosion, ensure the consolidation of these structures and integrate them into the landscape [11]. This in turn facilitates connectivity between habitats, the reestablishment of flows, functions and processes, and the overall restoration of the disturbed land [12].

The re-establishment of the vegetation cover is usually accelerated by hydroseeding [5, 13–18]. Before these techniques are applied, plant colonisation and growth is facilitated with a layer of topsoil spread across the surface to be restored [19–21]. Ideally, this fertile soil should be taken from the top 30 cm of the material removed prior to the earthworks. It is stockpiled in pyramids of varying height for different periods, depending on the civil engineering process [22, 23].

Topsoil is a valuable resource for the restoration of degraded zones due to its high contents in native seeds [21, 24, 25], nutrients and microorganisms [26]. Its contribution to the establishment and stabilization of the vegetation cover in disturbed areas has been proven in studies of roadside slope [6, 20–23, 27] and mine restoration [24, 28–31]. However, there is often a shortage of topsoil in civil engineering works because the area to be restored is usually larger than the area of the infrastructure platform *per se*. For this reason, when not enough fertile soil is available to restore the entire disturbed area, poor quality soil from deeper layers is employed, compromising the success of the restoration process [31]. Although other sources are available, few studies have compared the effectiveness of topsoil with other organic amendments in the restoration of the vegetation cover and the soil's former physico-chemical properties on road embankments.

Farm soil fertility is improved by applying fertilizers that changes its physico-chemical properties. Fertilizers are complex, specific and expensive, offset by the higher crop yield. Animal manure also improves the physical, chemical and biological properties of soil [32–37] and, in contrast to synthetic fertilisers, is easy to obtain at low cost from the increasing numbers of intensive livestock farms. Manure improves soil fertility and promotes plant growth by adding organic matter and nutrients such as nitrogen, phosphorus and potassium, as well as through increased soil pH [36, 38]. Organic matter has a positive effect on the soil water holding capacity, and thus increases the amount of water available for plants [39]. In addition to its positive effect on different pools and flows of carbon and nutrients, manure also increases soil heterotrophic respiration via the microbial biomass [40]. Manure thus has positive effects on plant performance and soil functioning.

In recent years, new applications for manure have been tested for the dual purpose of employing this organic nitrogen-rich resource and reducing surplus waste from livestock farms whose management requires non-amortizable investment by the farmer. Examples include the use of manure to improve semiarid soils [41] and former mines [42].

Fertilizers have been used in the revegetation of road embankments to accelerate the growth of the vegetation cover [43–45], but no cases of manure used for the same purpose have been published in scientific literature. Agroecosystem soils amended with manure contain greater biological activity and more organic matter in the long term than fertilizer-treated soil [35], supporting its use as an organic amendment to improve the results of restoration in harsh, nutrient-poor situations such as embankments.

The present study aimed to compare the effects of organic amendments (horse manure) and topsoil on soil physico-chemical properties (organic matter, total nitrogen, assimilable phosphorus and potassium, texture, soil water holding capacity, pH and compaction), soil microbial activity, erosion resistance, bare soil cover, plant species richness and species

composition on linear transport infrastructure embankments in the centre of the Iberian Peninsula.

Our hypotheses were: (H1) topsoil increases vegetation cover and species richness, reduces bare soil cover and erosion, and improves soil fertility, and (H2) manure yields similar results to those of topsoil in terms of bare soil cover and erosion reduction, increased concentration of organic matter and promotion of biological activity in the soil. Finally, the advantages and disadvantages of manure as an alternative to topsoil in embankment restoration are discussed.

## Material and methods

### Study area

The study area was east of Madrid (Spain) in Dehesa de Mari Martín, Navacarnero municipality (40° 18' N; 3° 58' W). The experimental zone was a railway easement under construction between two towns, Móstoles and Navacarnero. The area lies on sandstone and has a semi-arid Mediterranean climate, with cold winters and hot, dry summers. The mean minimum and maximum temperatures are 9 and 20°C, respectively, with 450 mm mean annual precipitation, mainly falling in autumn and spring.

### Experimental design

In December 2009, we selected a recently shaped north-facing embankment beside a railway line on a 14° slope. Prior to the treatments, the slope was cleared mechanically to remove the top 10 cm of the soil surface in order to ensure similar initial conditions in each plot. In October 2010, we staked out fifteen contiguous 4 x 9 m experimental plots, set in five blocks. The longer dimension of the plots follows the line of maximum slope. Three treatments were applied to the plots: Topsoil, Manure and Control. In the Topsoil treatment, fertile soil was spread mechanically to a uniform depth of 10 cm. This topsoil had been collected in December 2009 when the upper 30 cm of the land near the experimental embankment was removed. This material was stored for 10 months in 2 m high x 1.5 m wide pyramidal stockpiles, the common practice in this type of earthwork. The Manure treatment consisted of manually spreading horse dung at a ratio of 2 kg dry weight/m<sup>2</sup> across five of the experimental plots. Horse manure was chosen because its high organic matter and nitrogen content [46]. The manure was collected from a stud farm in the same municipality. The manure amendment used in the treatments consisted of a 3:1 mixture of horse dung and pine shavings (hereafter Manure), left in the open air for 8 months (February to October). The horses were fed a mixture of straw, hay and high-quality grainfeed. The Control plots received no treatment at all.

### Soil physico-chemical properties

In October 2010, following the treatments, the initial physico-chemical properties of the soil were tested using a composite soil sample per plot, collected using at least eight 4 cm diameter x 10 cm deep soil cores. These samples were air dried for 10 days and passed through a 2 mm mesh sieve. We then analysed the content in organic matter [47], total nitrogen (N; Kjeldahl), phosphorus (P) and assimilable potassium (K; EDTA acetate extraction; [48], percentages of sand, silt and clay [49] and water holding capacity [50]. Soil pH was measured in a 1:2.5 soil/water solution.

### Soil microbial respiration

Basal soil respiration or CO<sub>2</sub> production rate (g CO<sub>2</sub> m<sup>-2</sup> h<sup>-1</sup>) is widely used as an index for estimated soil microbial activity, given that the majority corresponds to the heterotrophic

respiration of microorganisms and not the autotrophic respiration of plant roots [51, 52]. This parameter was measured monthly for one year (December 2010 to November 2011) between 10 am and 12 pm to avoid heavy diurnal fluctuations. Soil respiration was measured at three points (upper, middle and low zone) in each plot using a PVC cylinder, then averaging the data for each plot and date. For this purpose, we used an Environmental CO<sub>2</sub> Gas Monitor (EGM-4) fitted with a Closed System Soil Respiration monitor (SRC). The sparse vegetation at the measurement points was removed a week before each measurement to prevent interference by the autotrophic respiration of the roots of freshly removed plants.

### Soil compaction and erosion

In March 2011 we measured soil compaction in the field using an IB penetrometer (Eijkelkamp Agrisearch Equipment BV, Giesbeek, Netherlands) at five random points in upper and lower zones of each plot. To determine the relative amount of erosion on the slope, we measured the width (W) and depth (D) of all rills found in each plot in October 2011 and November 2013 along two 2 m transects running perpendicular to the maximum slope, set 1 m from the edges of the plots, one in the upper part and the other in the lower part of the embankment. For each plot, zone and date we noted two erosion indices: number of rills (R) and rill size, as  $\Sigma W \times \Sigma D$  of all rills intercepted by the transect.

### Bare soil cover, plant species richness and floristic composition

In May 2011 and 2012, the optimum phenological period for the study of herbaceous annual communities on semi-arid embankments, we visually assessed the area of bare soil cover and every species cover in six 0.5 x 0.5 m quadrats (Three quadrats were located in the upper and three in the lower parts of the plot, distant 1 m between them and from the border of the plot). We also calculate species richness per quadrat.

### Data analysis

The effects of the treatments on soil compaction and physico-chemical properties were analysed with ANOVAs. The effect of the treatments on soil respiration, bare soil cover, soil compaction, erosion and species richness were analysed with repeated measures ANOVAs. Time was included as a between factor, while treatment (Topsoil, Manure and Control) and topographic position (upper and lower) were used as within-subject factors. The dependent variables were log-transformed where necessary to fulfil the assumption of normality. SPSS 15.0 (SPSS Inc., Chicago, IL, USA) was used for these analyses.

The response of floristic composition to the treatments over time was tested using Redundancy analysis (RDA) and Principal Response Curves (PRC) [53], starting with an RDA and inserting the treatments and slope zones as environmental variables and years as repeated measures. The significance of the treatments for floristic composition was tested with a Monte Carlo permutation test (499 permutations) and automatic selection. A PRC was then used to detect the temporal change in the floristic composition of the samples for each treatment. In this case, slope position was not used as an environmental variable due to its non-significance in the previous RDA analysis. PRC is a particular kind of redundancy analysis (RDA), in which interaction between treatments and years were the explanatory variables and years were the covariables [54]. The significance of the first axis of this RDA was checked also with a Monte Carlo permutations test of 499 permutations on the plots ( $n = 49$ ) but not the two years [54]. The result was a diagram with the first principal component of the variance explained by the treatments on the y-axis and time in the x-axis. The control treatment was used as the zero base line and the treatment effects were represented by the deviation of each treatment line

from this base line. Time, treatments and slope zones were coded as dummy variables and species values were centred. CANOCO 4.5 [55] was used for the RDA and PRC, and CANODRAW for Windows 4.12 [56] for the graphics.

### Ethics statement

Prior to the field studies, we obtained all the permits for the works. The Site Manager of Obrascon Huarte Lain S.A. and Madrid Regional Government were informed, since experimental plots were located on an embankment under construction. No protected species were sampled during the study.

## Results

### Soil physico-chemical properties

Soils in Manure plots had a higher P, K and water holding capacity than the Topsoil and Control plots (Table 1). The organic matter and N content in the Manure plots was as high as the Topsoil plots. pH was the only parameter that differed significantly between the three treatments, increasing in the following order: Topsoil, Manure and Control. The soil in the Control plots showed no significant difference from the Manure plots in the measured physical parameters. However, Topsoil plots had a smaller proportion of clay and more silt than the other two treatment plots (Table 1)

### Soil microbial respiration

Soil respiration varied through the year ( $F = 64.9, P < 0.001$ ). The lowest soil respiration data coincided with the months with the lowest rainfall and temperatures, while the peak matched the period with the highest moisture and higher temperature conditions (Fig 1). The repeated measures analysis showed a significant effect of the treatment ( $F = 9.03; P < 0.01$ ), with a significantly higher rate of CO<sub>2</sub> production generally found in the Topsoil plots than the Manured and Control plots. Neither position nor interaction with the treatment were significant ( $P > 0.05$  in both cases).

### Soil compaction and erosion

A significant effect of the treatment was found in the case of compaction ( $F = 8.66, P < 0.001$ ), as Topsoil plots were found to be less compact than the Control and Manure plots (Fig 2a).

**Table 1. Soil physico-chemical parameters (mean ± EE) for each treatment.** Differences between treatments (g.l = 2; n = 15) are shown with letters. WC: Water holding capacity, OM: organic matter, P: assimilable Phosphorous, K: assimilable Potassium, N: Total Nitrogen. Different letters indicate significant differences between treatments (Post hoc Turkey test,  $P < 0.05$ ).

| Parameter   | Control                    | Topsoil                    | Manure                     | F     | P      |
|-------------|----------------------------|----------------------------|----------------------------|-------|--------|
| WC (g/kg)   | 58 ± 6.25 <sup>a</sup>     | 52.7 ± 1.82 <sup>a</sup>   | 69.4 ± 9.13 <sup>b</sup>   | 8.65  | 0.05   |
| OM (g/kg)   | 1.2 ± 0.86 <sup>a</sup>    | 10.0 ± 1.02 <sup>b</sup>   | 9.7 ± 3.15 <sup>b</sup>    | 32.46 | <0.001 |
| P (mg/100g) | 0.2 ± 0.04 <sup>a</sup>    | 0.2 ± 0.08 <sup>a</sup>    | 1.1 ± 0.18 <sup>b</sup>    | 88.19 | <0.001 |
| N (g/kg)    | 0.2 ± 0.03 <sup>a</sup>    | 0.7 ± 0.08 <sup>b</sup>    | 0.6 ± 0.11 <sup>b</sup>    | 50.81 | <0.001 |
| K (mg/100g) | 6.2 ± 0.64 <sup>a</sup>    | 5.9 ± 0.38 <sup>a</sup>    | 22.5 ± 8.67 <sup>b</sup>   | 17.90 | <0.001 |
| pH          | 7.4 ± 0.29 <sup>c</sup>    | 5.3 ± 0.04 <sup>a</sup>    | 6.6 ± 0.62 <sup>b</sup>    | 35.31 | <0.001 |
| Clay (g/kg) | 169.3 ± 13.03 <sup>b</sup> | 99.7 ± 4.63 <sup>a</sup>   | 177.0 ± 17.41 <sup>b</sup> | 55.02 | <0.001 |
| Sand (g/kg) | 722.3 ± 22.61              | 721.7 ± 25.18              | 698.1 ± 16.59              | 2.02  | >0.05  |
| Silt (g/kg) | 108.4 ± 12.63 <sup>a</sup> | 178.6 ± 25.78 <sup>b</sup> | 124.9 ± 14.27 <sup>a</sup> | 19.62 | <0.001 |

<https://doi.org/10.1371/journal.pone.0174622.t001>

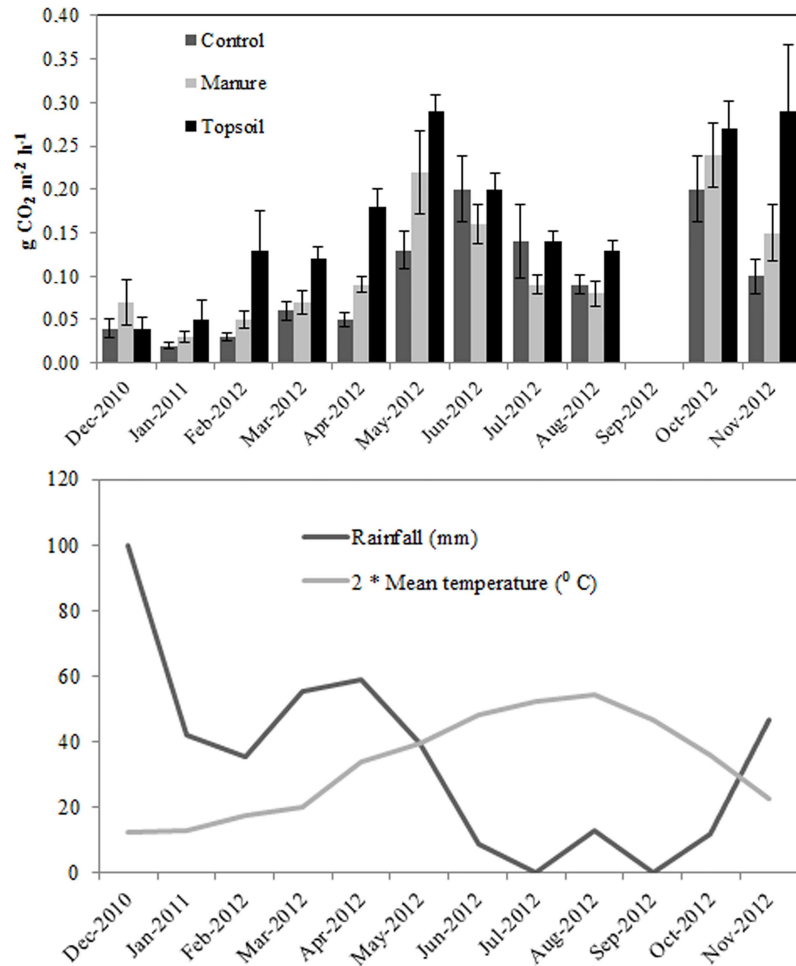

**Fig 1.** A) Graph representation of the period December 2010 to November 2011 showing mean monthly CO<sub>2</sub> production rate (g CO<sub>2</sub> m<sup>-2</sup> h<sup>-1</sup>) in the experimental plots by each treatment: Control, Manure and Topsoil. The error bars show the standard error. B) Ombrothermic diagram of the study area for the same period.

<https://doi.org/10.1371/journal.pone.0174622.g001>

However, there was no significant effect of zone or interaction on this parameter ( $F = 1.42$ ,  $P = 0.24$  and  $F = 1.61$ ,  $P = 0.22$ , respectively).

The type of treatment had a significant effect on both the number and size of the rills ( $F = 14.06$ ,  $P < 0.001$  and  $F = 13.25$ ,  $P < 0.001$ , respectively). Both of these erosion parameters were highest in Control plots and slightly higher in Manure than Topsoil plots (Fig 3a and 3b). There was also a significant effect of position area ( $F = 14.18$ ,  $P < 0.01$  and  $F = 6.84$ ,  $P < 0.01$ , respectively), with higher values of both erosion indicators in the lower zones of the embankment (Fig 3a and 3b). None of these parameters showed significant effects of time ( $F = 1.69$ ,  $P = 0.20$  and  $F = 0.01$ ,  $P = 0.92$ , respectively) or time × treatment interaction ( $F = 0.82$ ,  $P = 0.43$  and  $F = 0.44$ ,  $P = 0.65$ , respectively).

### Bare soil cover, plant species richness and floristic composition

Bare soil cover was higher in the Control than the Topsoil and Manure treatments, with no difference between the latter two ( $F = 35.67$ ,  $P < 0.001$ , Fig 2b). This parameter decreased with time ( $F = 310.81$ ,  $P < 0.001$ ), with no significant effect of location or interaction with treatment



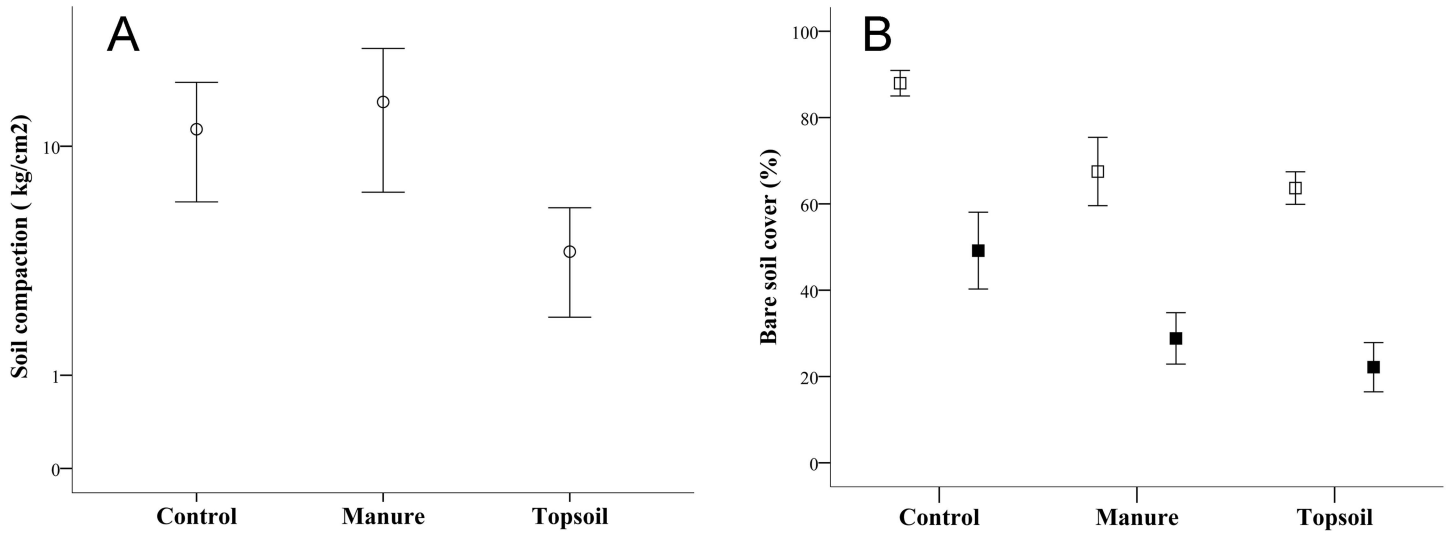

**Fig 2. A) Soil compaction measured in March 2011 and B) Bare soil cover in the two sampling seasons (May 2011: open quadrats) and May 2012 (black quadrats) in experimental plots (Control, Manure and Topsoil).** Error bars represent 95% confidence intervals

<https://doi.org/10.1371/journal.pone.0174622.g002>

( $F = 2.78, P = 0.10$  and  $F = 1.92, P = 0.15$ , respectively). Species richness was greater in the Topsoil than the Manure and Control treatments during the two sampling years ( $F = 32.39, P < 0.001$ , Fig 4a and 4b). It was also higher in the upper areas of the embankment ( $F = 17.92, P < 0.001$ ), and increased with time ( $F = 60, P < 0.001$ ). There was no significant effect of interaction ( $F = 0.39, P = 0.87$ ). The automatic selection of the first RDA shows that floristic composition differed between the Topsoil treatment and the other two (Control and Manure), with no significant differences between latter two ( $F = 4.32, P = 0.07$ ). Slope position was also non-significant ( $F = 1.53, P = 0.34$ ). Only the first axis of the PRC was significant ( $F = 22.23, P = 0.02$ ). The PRC diagram (Fig 5) shows a year-by-year comparison between the treatments and the designated “control” (horizontal axis). The PRC confirmed the homogeneity of the

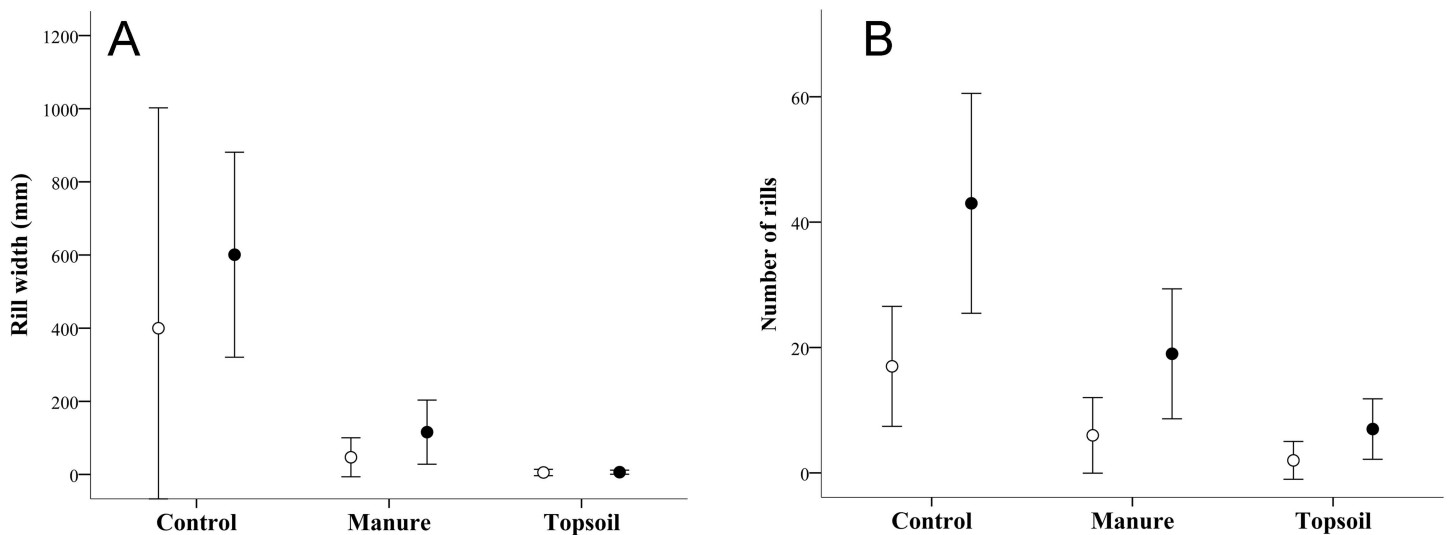

**Fig 3. A) Mean number of rills for the two experimental years and B) Accumulated rill width in 2 m transects on experimental plots in the upper (open circles) and lower (black circles) parts of the embankment (Control, Manure and Topsoil).** Error bars represent 95% confidence intervals

<https://doi.org/10.1371/journal.pone.0174622.g003>

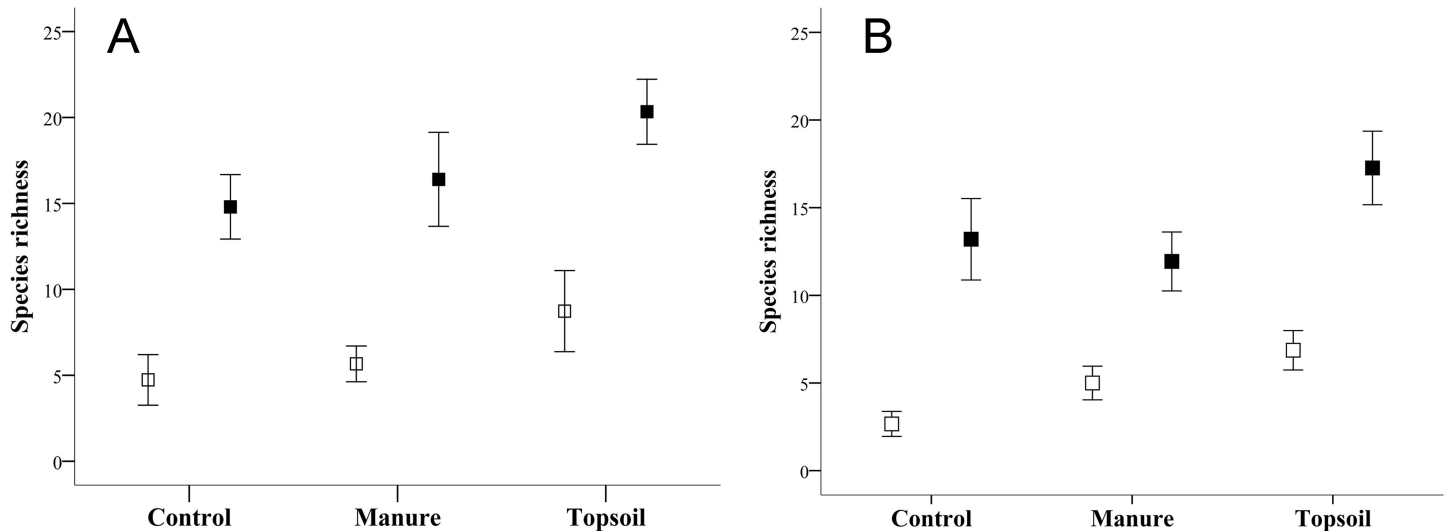

**Fig 4. Species richness for (A) upper slope zones and (B) lower slope zones in the two sampling seasons (May 2011: open quadrats) and May 2012 (black quadrats) in experimental plots (Control, Manure and Topsoil). Error bars represent 95% confidence intervals.**

<https://doi.org/10.1371/journal.pone.0174622.g004>

plots in Spring 2011. Only the Topsoil plots differed from the Control and Manure plots after two years of the experiment.

## Discussion

### Soil fertility and microbial activity

The results of this study show that horse manure can be a useful alternative to spread topsoil if the aim is to improve variables related to soil fertility, organic matter content and total N. This improvement is indispensable to overcome the abiotic filter that influences the establishment of plant communities on embankments in Mediterranean environments, where soils are usually poor and rainfall is low [4]. Several authors have discussed the difficulty of ensuring stable vegetation cover on embankments due to poor soil quality, amongst other hindrances, [5, 21–23, 57], making the input of nutrient-rich substrates a good option to enhance restoration. In our study both topsoil and manure increased the organic matter and N concentration in soils compared with the control plots, but spread manure contributed to a higher concentration of soil nutrients that are essential for plant growth (P and K), than areas amended with topsoil. Several authors have noted that manure is a major source of soil nutrients in different ecosystems [36, 38, 42, 49, 58, 59]. Similarly, the present study shows that topsoil and manure amendments can improve the soil fertility of embankment, despite the fact that the previous levels of organic matter and N in these soils were lower than those in other similar restoration projects [5, 21, 22, 57, 60]. Thus, manure is a viable alternative to topsoil in linear infrastructure restoration projects aimed at improving soil fertility on embankments in Mediterranean environments. Importantly, manure is easier to obtain and handle than topsoil.

Several studies have shown that biochemical indices such as soil respiration and microbial biomass are sensitive indicators of changes in soil organic matter quality and nutrient cycling following the implementation of new management strategies [61–63]. We found that amendments rich in organic matter increased microbial activity, confirming our hypothesis, and topsoil achieved better results in this respect than manure. Organic matter is one of the most important sources of energy and nutrients for microbial growth. Excess nutrient availability



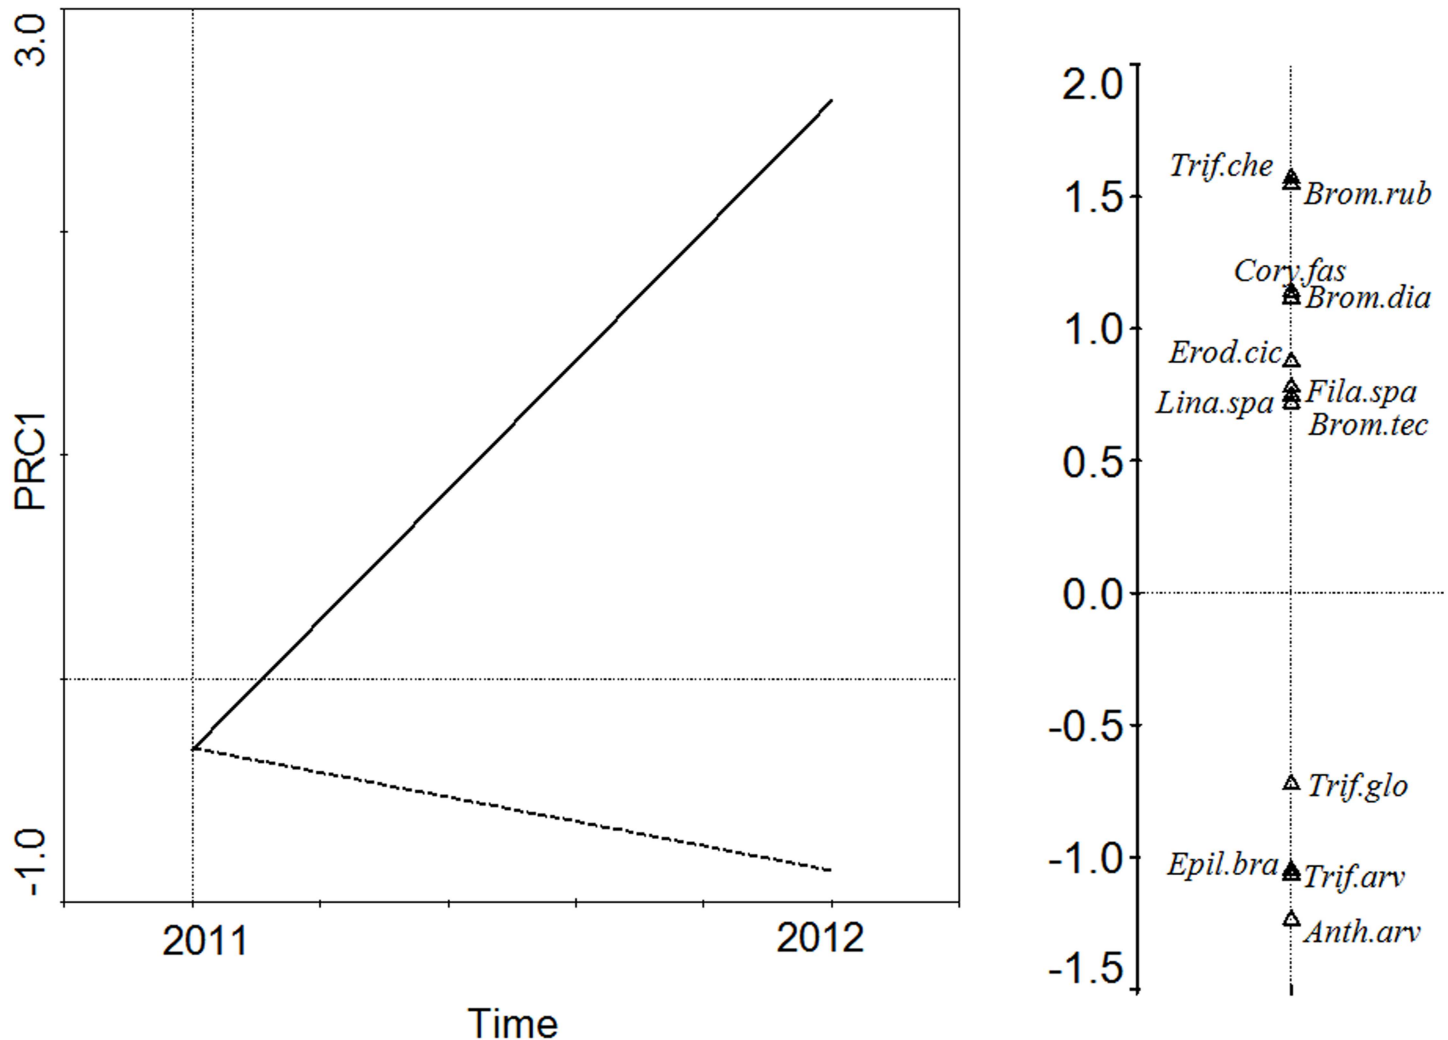

**Fig 5. Species composition response to treatments.** Y-axis in Principal Response Curves PRC diagram: first component of variation explained by differences in treatment over time. X-axis: control treatments. Dotted line: manure treatment. Solid line: topsoil treatment. The weighting of each species on the principal axis (right of PRC diagram) represents affinity of each species to treatments. Species with positive weighting in PRC1 are abundant in Topsoil plots while species with negative weighting are abundant in Manure plots. Only species showing fits greater than 5 are shown. **Anth.arv**, *Anthemis arvensis*; **Brom.rub**, *Bromus rubens*; **Brom.dia**, *Bromus diandrus*; **Brom.tec**, *Bromus tectorum*; **Cory.fas**, *Corynephorus fasciculatus*; **Epil. Bra**, *Epilobium brachicarpum*; **Fila.spa**, *Filago spatulata*; **Lina.spa**, *Linaria spartea*; **Trif.arv.**, *Trifolium arvense*; **Trif.che**, *Trifolium cherleri*; **Trif.glo**, *Trifolium glomeratum*.

<https://doi.org/10.1371/journal.pone.0174622.g005>

and exogenous labile carbon sources, especially beneath topsoil, can stimulate heterotrophic microorganism activity [63], presumably due to shifts in the microbial community towards species with high turnover rates or greater microbial biomass cycling. We propose the following mechanisms to explain the greater increase in soil respiration found in the topsoil compared to the manure plots: i) higher proportion of labile C in the topsoil, or ii) higher C:N ratio of manure, which may reduce microbial growth and enzyme production by hindering the supply of microbial N [64]. Further research to clarify these potential hypotheses would be needed in future, since our study did not measure labile C or C/N ratio.

We also found a higher rate of soil respiration in all the experimental plots, coinciding with the months of peak soil moisture and temperature, which favour microbial activity [65], especially in disturbed soil [66, 67]. Monthly soil respiration data in plots with spread topsoil or

manure (0.04–0.29 and 0.03–0.24 g CO<sub>2</sub> m<sup>-2</sup> h<sup>-1</sup>) were similar to those found in temperate grassland (0.05 g CO<sub>2</sub> m<sup>-2</sup> h<sup>-1</sup>) [68], but lower than those measured in Mediterranean forests (0.268 and 0.887 g CO<sub>2</sub> m<sup>-2</sup> h<sup>-1</sup>) [69] since tree roots, non-existent in the present study, greatly increase the respiration rate [70, 71].

### Soil erosion and compaction

Spread topsoil and manure had an equivalent detrimental effect on slope erosion measured by the number and size of rills. Both indicators were higher in the lower than the upper embankment zones, possibly due to the cumulative effect related to the slope [72]. The high soil organic matter content prompted by both manure and topsoil may have contributed to the formation of stable aggregates in the soil [35, 73], reducing erosion rates. However, soil compaction was higher in plots with manure than with topsoil. This is a congruous result considering that the relatively soft topsoil layer was 10 cm deep, while the manure was spread in a layer measuring less than 3 cm, and consequently, soil physical properties did not differ between Manure and Control treatments. For the same reason, the clay content was higher in the plots restored with manure than with topsoil, which may have contributed to the compaction found beneath this organic amendment, given that finer soil textures are associated with more compact soils. Previous studies have found that soil compaction hinders the establishment of soil microbiota [74], which in turn directly affects the metabolism of the soil ecosystem and explains the poorer response of soil respiration to the manure vs. the topsoil treatment in this study.

### Bare soil, plant richness and community composition

Spread topsoil and manure produced a similar reduction in bare soil cover associated with erosion [4, 75]. This result is consistent with those found by other authors on road embankments where topsoil had been spread [21]. Both treatments seem to have facilitated colonization by herbs from first months after the slope had been formed. This result is important as it suggests that manure can replace the complicated and expensive topsoil handling process when slopes have to be revegetated quickly immediately after their construction.

On the other hand, plots with spread topsoil had greater species richness and a different floristic composition from those with manure, which resembled the control plots in this aspect. This result is possibly associated with the greater viable seed content and species richness of the seed banks in the plots covered with topsoil than those with manure quantified by Rivera [76], in the same experimental plots. This author found that the viable seed density in seed banks in zones treated with topsoil was around 5100 viable seeds m<sup>-2</sup>. After 10 months' stockpiling followed by spreading on the experimental plots, the number of viable seeds declined to 3501 viable seeds m<sup>-2</sup> and 28 species, while the seed banks in plots with manure contained 3422 viable seeds m<sup>-2</sup> and 14 species. It should be noted that the source of the manure employed in this experiment was an intensively managed stud where the horses were not fed natural grass. Manure from farms with extensive summer grazing would have contributed a larger number of seeds and might therefore be more useful for restoring the vegetation cover [77].

### Conclusions

Topsoil is a highly valuable resource for restoring degraded land, although its availability is often limited because the surface area to be restored is usually larger than that of the road or railway easement from where it is removed. Low cost, widely available organic amendments such as manure seem to be a viable alternative, depending on the objectives of the restoration

project. The use of both topsoil and manure is recommended to accelerate restoration and revegetation of slopes during the early stages after linear infrastructure construction, when physical stabilization is a priority given the high erosion rates found on recently build embankments. Furthermore, topsoil is recommended when restoration is aimed at increasing or maintaining the diversity of the local vegetation.

## Supporting information

**S1 File. Dataset used for the analysis.**  
(RAR)

## Acknowledgments

Thanks to Alfredo Alcalde for helping to measure the soil erosion parameters.

## Author Contributions

**Conceptualization:** BP DR BMJ.

**Data curation:** BP DR BMJ.

**Formal analysis:** BP DR BMJ.

**Funding acquisition:** BP.

**Investigation:** BP DR BMJ.

**Methodology:** BP DR BMJ.

**Project administration:** BP DR BMJ.

**Resources:** BP.

**Supervision:** BP BMJ.

**Validation:** BP BMJ.

**Visualization:** BP DR BMJ.

**Writing – original draft:** BP DR PGP BMJ.

**Writing – review & editing:** BP DR PGP BMJ.

## References

1. Forman RTT. Estimate of the area affected ecologically by the road system in the United States. *Conserv Biol.* 2000; 14: 31–35.
2. European Union (EU). EU transport in figures, Statistical Pocketbook 2011. Publications Office of the European Union. 2011.
3. Martínez-Alonso C, Valladares F. La pendiente y el tipo de talud alteran la relación entre la riqueza de especies y la cobertura de las comunidades herbáceas. *Ecología.* 2002; 16: 59–71.
4. Bochet E, García-Fayos P. Factors controlling vegetation establishment and water erosion on motorway slopes in Valencia, Spain. *Restor Ecol.* 2004; 12: 166–174.
5. Matesanz S, Valladares FJ, Tena D, Costa-Tenorio M, Bote D. Early dynamics of plant communities on revegetated motorway slopes from southern Spain: Is hydroseeding always needed? *Restor Ecol.* 2006; 14: 297–307.
6. Balaguer L. Las limitaciones de la restauración de la cubierta vegetal. *Ecosistemas.* 2002; 11: 72–82.

7. García-Palacios P, Bowker MA, Maestre FT, Soliveres S, Valladares F, Papadopoulos J, et al. Ecosystem development in roadside grasslands: biotic control, plant–soil interactions and dispersal limitations. *Ecol Appl*. 2011a; 21: 2806–2821.
8. Arnáez J, Larrea V. Erosion processes and rates on road-sides of hill-roads (Iberian system, La Rioja, Spain). *Phys Chem Earth*. 1995; 20: 395–401.
9. Nicolau JM. Runoff generation and routing on artificial slopes in a Mediterranean–continental environment: the Teruel coalfield, Spain. *Hydrol Process*. 2002; 16: 631–647.
10. García-Fayos P, Garcia-Ventoso B, Cerdà A. Limitations to plant establishment on eroded slopes in southeastern Spain. *J Veg Sci*, 2000; 11: 77–86.
11. Hobbs RJ, Harris JA. Repairing the Earth's ecosystems in the new millennium. *Restor Ecol*, 2001; 9: 239–246.
12. Forman RTT, Alexander LE. Roads and their major ecological effects. *Annu Rev Ecol Evol Syst*. 1998; 29: 207–231.
13. Enríquez A, Carrasco MJ, Varela JM. Seguimiento y eficacia de la restauración vegetal de embankments de autovías. *Ingeniería Civil*. 2004; 134: 27–35.
14. Jochimsen ME. Vegetation development and species assemblages in a long-term reclamation project on mine spoil. *Ecol Eng*. 2001; 17: 187–198
15. Holl KD. Long-term vegetation recovery on reclaimed coal surface mines in the eastern USA. *J Appl Ecol*. 2002; 39: 960–970.
16. Benik SR, Wilson BN, Biesboer DD, Hansen B, Stenlund D. Evaluation of erosion control products using natural rainfall events. *J Soil Water Conserv*. 2003; 58: 98–105.
17. Mitchell DJ, Barton AP, Fullen MA, Hocking TJ, Zhi WB, Zheng Y. Field studies of the effects of jute geotextiles on runoff and erosion in Shropshire, UK. *Soil Use Manag*. 2003; 19: 182–184.
18. Rickson RJ. Controlling sediment at source: an evaluation of erosion control geotextiles. *Earth Surf Proc Land*, 2006; 31: 550–560.
19. Patzelt A, Wild U, Pfadenhauer J. Restoration of wet fen meadows by topsoil removal: vegetation development and germination biology of fen species. *Restor Ecol*. 2001; 9: 127–136.
20. Bote D, Valladares FJ, Matesanz S, Tena D. Importancia de la tierra vegetal en la vegetación de desmonte. *Cienc Tec*. 2005; 80: 19–24.
21. Tormo J, Bochet E, García-Fayos P. Roadfill revegetation in semiarid mediterranean environments. Part II: Topsoiling, species selection, and hydroseeding. *Restor Ecol*. 2007; 15: 97–102.
22. Bochet E, Tormo J, García-Fayos P. Native species for roadslope revegetation: Selection, validation and cost effectiveness. *Restor Ecol*. 2010; 18 (5): 656–663.
23. Mola I, Jiménez MD, López-Jiménez N, Casado MA, Balaguer L. Roadside reclamation outside the revegetation season: Management options under schedule pressure. *Restor Ecol*. 2011; 19: 83–92.
24. Rokich DP, Dixon KW, Sivasithamparam K, Meney KA. Topsoil handling and storage effects on woodland restoration in Western Australia. *Restor Ecol*. 2000; 8: 196–208.
25. Holmes PM. Invasion and mining: Effects of topsoil depth, seed source, and fertilizer addition. *Restor Ecol*. 2001; 9: 71–84.
26. Visser S, Fujikawa J, Griffiths CL, Parkinson D. Effect of topsoil storage on microbial activity, primary production and decomposition potential. *Plant Soil*. 1984; 82: 41–50.
27. Scoles SJ, DeFalco LA. The revegetation of disturbed areas associated with roads at Lake Mead National Recreation Area. Nevada. Report prepared for National Park Service. Lake Mead National Recreation Area. 11pp. [Technical Report]; 2003.
28. Zhang ZQ, Shu WS, Lan CY, Wong MH. Soil seed bank as an input of seed source in revegetation of lead/zinc mine tailings. *Restor Ecol*. 2001; 9: 378–385.
29. Bowen CK, Schuman GE, Olson RA, Ingram LJ. Influence of topsoil depth on plant and soil attributes of 24-year old reclaimed mined lands. *Arid Land Res Manag*. 2005; 19: 267–284.
30. Hall SH, Barton CD, Baskin CC. Topsoil seed bank of an Oak-Hickory forest in eastern Kentucky as a restoration tool on surface mines. *Restor Ecol*. 2010; 18: 834–842.
31. Gonzalez–Alday J, Marrs R, Martinez-Ruiz C. Soil seed bank formation during early revegetation after hydroseeding in reclaimed coal wastes. *Ecol Eng*. 2009; 35: 1062–1069.
32. Ye ZH, Wong JWC, Wong MH. Vegetation response to lime and manure compost amendments on acid Lead/Zinc mine tailings: A greenhouse study. *Restor Ecol*. 2000; 8(3): 289–295.
33. Barzegar AR, Yousefi A, Daryshenas A. The effect of addition of different amounts and types of organic materials on soil physical properties and yield of wheat. *Plant Soil*. 2002; 247: 295–301.

34. Burton CH, Turner C. Manure management: treatment strategies for sustainable agricultura. Editions Quae; 2003. 451 pp.
35. Edmeades D. The long-term effects of manures and fertilisers on soil productivity and quality: a review. *Nutr Cycl Agroecosys*. 2003; 66: 165–180.
36. Clemente R, Almela C, Bernal MP. A remediation strategy based on active phytoremediation followed by natural attenuation in a soil contaminated by pyrite waste. *Environ Pollut*. 2006; 143 (3): 397–406. <https://doi.org/10.1016/j.envpol.2005.12.011> PMID: 16472894
37. Baker LR, White PM, Pierzynski GM. Changes in microbial properties after manure, lime, and bentonite application to a heavy metal-contaminated mine waste. *Appl Soil Ecol*. 2011; 48: 1–10.
38. Dellaguardia CS. Management, Uses and Environmental Impacts. Nova Science Pub Inc; 2010. 198 pp.
39. Hudson BD. Soil organic matter and available water capacity. *J Soil Water Conserv*. 1994; 49: 189–194.
40. Zhen Z, Liu H, Wang N, Guo L, Meng J, Ding N, et al. Effects of Manure Compost application on soil microbial community diversity and soil microenvironments in a temperate cropland in China. *PLoS ONE*. 2014; 9: e108555. <https://doi.org/10.1371/journal.pone.0108555> PMID: 25302996
41. Ros M, Hernandez MT, García C. Soil microbial activity after restoration of a semiarid soil by organic amendments. *Soil Biol Biochem*. 2003; 35: 463–469.
42. Chiu KK, Ye ZH, Wong MH. Growth of *Vetiveria zizanioides* and *Phragmites australis* on Pb/Zn and Cu mine tailings amended with manure compost and sewage sludge: A greenhouse study. *Bioresour Technol*. 2006; 97: 158–170. <https://doi.org/10.1016/j.biortech.2005.01.038> PMID: 16154513
43. Stafford RF. Fertilization and legume establishment on highway slopes. *Transportation Res Board*. 1982; 859: 19–24.
44. García-Palacios P, Soliveres S, Maestre FT, Escudero A, Valladares F, Castillo-Monroy AP. Dominant plant species modulates responses to hydroseeding, irrigation and fertilization during the restoration of semiarid motorway slope. *Ecol Eng*. 2010; 36: 1290–1298.
45. García-Palacios P, Bowker MA, Chapman SJ, Maestre FT, Soliveres S, Gallardo A, et al. Early-successional vegetation changes after roadside prairie restoration modify processes related with soil functioning by changing microbial functional diversity. *Soil Biol Biochem*. 2011b; 43:1245–1253.
46. Moral R, Moreno-Caselles J, Perez-Murcia MD, Perez-Espinosa A, Rufete B, Paredes C. Characterisation of the organic matter pool in manures. *Bioresour Tech*. 2005; 96: 153–158.
47. Walkley A, Black IA. An examination of the Degtjareff method for determining soil organic matter, and a proposed modification of the chromic acid titration method. *Soil Sci*. 1934; 34: 29–38.
48. Cottenie A, Kiekens L, Verloo M. Principles of soils and substrate analysis with regards to mobility of nutrient elements. *Pedologie*. 1975; 25: 134–142.
49. Day PR. Particle fractionation and particle-size analysis. In Page AL, editor. *Methods of Soil Analysis: American Society of Agronomy, Madison, WI, US.*; 1965. pp 545–567.
50. Richards LA. *Diagnosis and improvement of saline and alkali soils*. USDA US Govt. Printing Office, Washington, DC, USA; 1954. pp. 109–110.
51. Pascual J.A., García C, Hernandez T, Ayuso M. Changes in the microbial activity of an arid soil amended with urban organic wastes. *Biol Fert Soils*. 1997; 24: 429–434.
52. Kuzyakov Y. Sources of CO<sub>2</sub> from soil and review of partitioning methods. *Soil Biol Biochem*. 2006; 38: 425–448.
53. Van den Brink PJ, Ter Braak CJF. Principal Response Curves: analysis of time-dependent multivariate responses of biological community to stress. *Environ Toxicol Chem*. 1999; 18: 138.
54. Leps J, Šmilauer P. *Multivariate analysis of ecological data using CANOCO*. Cambridge University Press; 2003.
55. Ter Braak CJF, Šmilauer P. *CANOCO reference manual and CanoDraw for Windows user's guide: software for canonical community ordination (version 4.5)*. Microcomputer Power, Ithaca, New York, US; 2002.
56. Šmilauer P. *CanoDraw 3.0*. Environmental Change Research Centre, University College, London; 1993.
57. Andrés P, Jorba M. Mitigation strategies in some motorway embankments (Catalonia, Spain). *Restor Ecol*. 2000; 8 (3): 268–275.
58. Redente EF, Doerr TB, Grygiel CE, Biondini ME. Vegetation establishment and succession on disturbed soils in northwest Colorado. *Reclam Reveg Res*. 1984; 3: 153–165.

59. Haynes RJ, Naidu R. Influence of lime, fertilizer and manure applications on soil organic matter content and soil physical conditions: a review. *Nutr Cycl Agroecosys*. 1998; 51: 123–137.
60. Jimenez MD, Ruiz-Capillas P, Mola I, Pérez-Corona E, Casado MA, Balaguer L. Soil development at the roadside: a case study of a novel ecosystem. *Land Degrad Dev*. 2011.
61. Schnürer J, Clarholm M, Rosswall T. Microbial biomass and activity in an agricultural soil with different organic matter contents. *Soil Biol Biochem*. 1985; 17: 611–618.
62. Jacinth PA, Lal R, Kimble JM. Carbon budget and seasonal carbon dioxide emission from a central Ohio Luvisol as influenced by wheat residue amendment. *Soil Till Res*. 2002; 67: 147–157.
63. Araújo ASF, Santos VB, Monteiro RTR. Responses of soil microbial biomass and activity for practices of organic and conventional farming systems in Piauí state, Brazil. *Eur J Soil Biol*. 2008; 44: 225–230.
64. Berg B. Nutrient release from litter and humus in coniferous forest soils—a mini review. *Scand J For Res*. 1986; 1: 359–369.
65. Davidson EA, Belk E, Boone RD. Soil water content and temperature as independent or confounded factors controlling soil respiration in a temperate mixed hadwood forest. *Glob Chang Biol*. 1998; 4: 217–227.
66. Litton CM, Ryan MG, Knight DH, Stahl PD. Soil surface carbon dioxide efflux and microbial biomass in relation to tree density 13 years after a stand replacing fire in a lodgepole pine ecosystem. *Glob Chang Biol*. 2003; 9: 680–696.
67. Castillo-Monroy AP. Ecología funcional de la costra biológica en ambientes semiáridos gipsícolas de la Península Ibérica. M.Sc. Thesis, Universidad Rey Juan Carlos. 2010.
68. Raich JW, Schlesinger WH. The global carbon dioxide flux in soil respiration and its relationship to vegetation and climate. *Tellus*. 1992; 44B: 81–99.
69. King JA, Harrison R. Measuring soil respiration in the field: An automated closed chamber system compared with portable IRGA and alkali absorption methods. *Commun. Soil Sci Plant Anal*. 2002; 33: 403–423.
70. Hanson PJ, Edwards NT, Garten CT, Andrews JA. Separating root and soil microbial contributions to soil respiration: A review of methods and observations. *Biogeochemistry*. 2000; 48: 115–146.
71. Tang J, Baldocchi DD. Spatial–temporal variation in soil respiration in an oak–grass savanna ecosystem in California and its partitioning into autotrophic and heterotrophic components. *Biogeochemistry*. 2005; 73: 183–207.
72. Prosdocimi M, Cerdà A, Tarolli P. Soil water erosion on Mediterranean vineyards: A review (Review), *Catena*. 2016; 141: 1–21.
73. Ekwue EI. Effect of organic and fertilizer treatments on soil physical properties and erodibility. *Soil Tillage Res*. 1992; 22: 199–209.
74. Ruser R, Flessa H, Russow R, Schmidt G, Buegger F, Munch JC. Emission of N<sub>2</sub>O, N<sub>2</sub>, and CO<sub>2</sub> from soil fertilized with nitrate: Effect of compaction, soil moisture, and rewetting. *Soil Biol Biochem*. 2006; 38: 263–274.
75. Petersen S, Roundy B, Bryant R. Revegetation methods for high-elevation roadsides at Bryce Canyon National Park, Utah. *Restor Ecol*. 2004; 12 (2): 248–257.
76. Rivera D. Dinamica de la revegetacion de taludes de infraestructuras lineales: Manejo y optimización de la cobertura vegetal. M.Sc. Thesis, Autonomous University of Madrid. 2012.
77. Traba J, Levassor C, Peco B. Restoration of species richness in abandoned Mediterranean grasslands: seeds in cattle manure. *Restor Ecol*. 2003; 11: 378–384.
